# Supplementary material
Source: PubMed Central journal article supplement (PMC5110219)
Supplement: NIHMS828373-supplement-1.pdf [file NIHMS828373-supplement-1.pdf]

Figure S1, Identification of sidRNAs, Related to Figure 1.

Figure S2, Identification of Endosperm-Specific sidRNAs, Related to Figure 1.

Figure S3, Detection of sidRNAs from Transgenic Loci and Transposons Undergoing *de novo* Silencing, Related to Figure 1.

Figure S4, Identification of Distributive 3'-5' Exonucleases Required for DNA Methylation, Related to Figure 6.

Table S1, Summary of Small RNA Sequencing Datasets, Related to Figures 1, 2, 3, 5, and 6

Table S2, Identification of sidRNA Loci (sidRLs), Related to Figure 1

Table S3, Effects of *Pol IVRDR2* Mutations on sidRNA Production, Related to Figure 2

Table S4, Identification of Endosperm-Specific sidRNA Loci (ES-sidRLs), Related to Figure S2

Table S5, Summary of Whole Genome Bisulfite Sequencing Datasets, Related to Figure 4

Table S6, Profiles of DNA Methylation at sidRNA Loci by Whole-Genome Bisulfite Sequencing, Related to Figure 4

Table S7, Identification of sidRNA Loci that Are Controlled by Atrimmer1 and/or Atrimmer2, Related to Figure 6

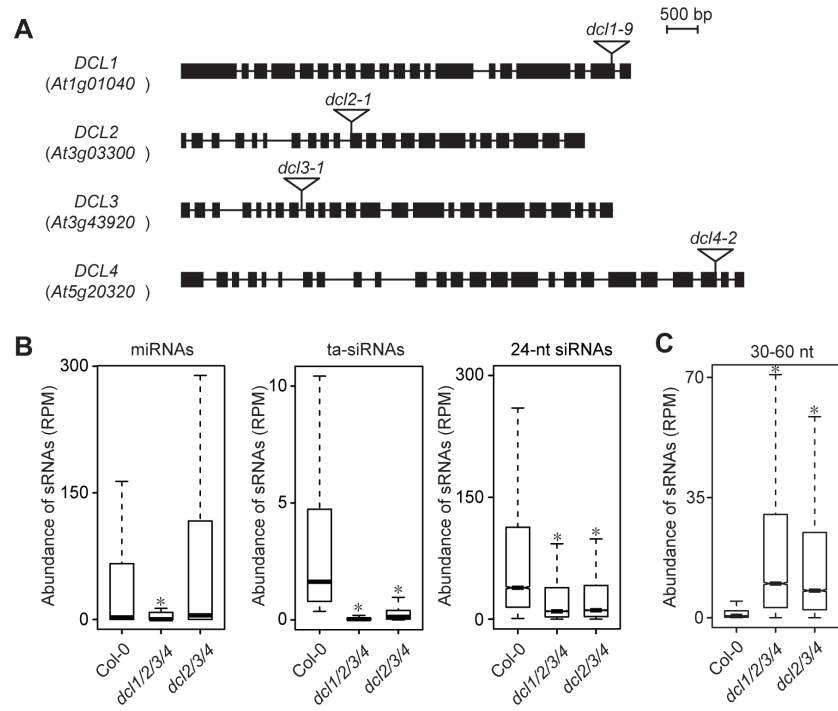

**Figure S1, Identification of sidRNAs, Related to Figure 1.**

(A) Diagrams showing the gene structures of *DCLs*. The positions of T-DNA insertions are indicated.

(B) Box plots of the levels of miRNAs, ta-siRNAs and P4siRNAs in the indicated plants.

(C) Box plots of the levels of 30-60-nt sRNAs generated from sidRNA loci in the indicated plants.

Asterisks indicate a significant difference between Col-0 and the mutants ( $P < 10^{-15}$ , Mann-Whitney U test).

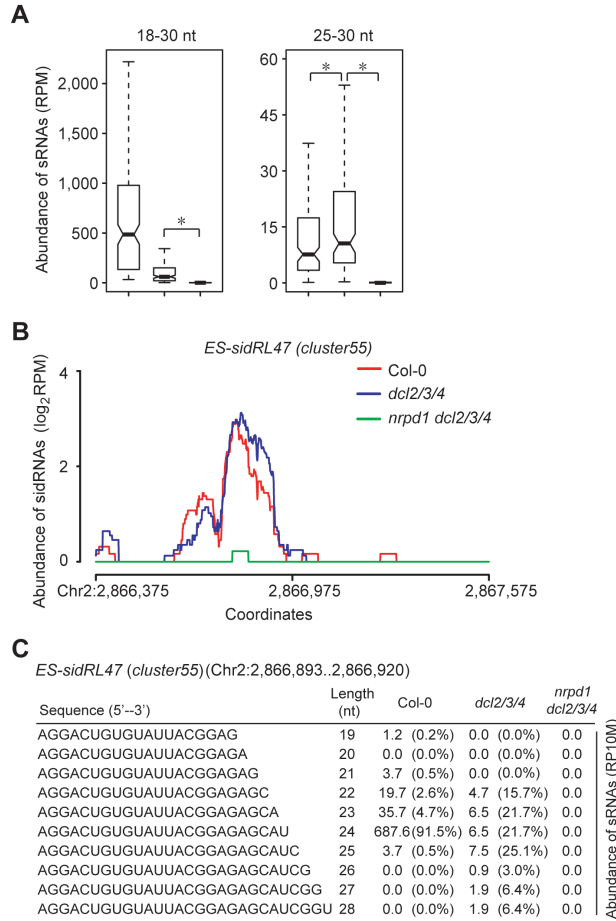

**Figure S2, Identification of Endosperm-Specific sidRNAs, Related to Figure 1.**

(A) Box plots of levels of sRNAs of the indicated sizes produced from endosperm-specific sidRNA loci in Col-0, *dcl2/3/4* and *dcl1/2/3/4*. Asterisks indicate a significant difference between Col-0 and the mutants ( $P < 10^{-15}$ , Mann-Whitney *U* test).

(B) Density of sidRNAs mapped to the *ES-sidRL47 (cluster55)* locus in the indicated plants.

(C) A representative group of ladderized sRNAs produced from *ES-sidRL47 (cluster55)* locus. Numbers represent the abundance (RPM) of sRNAs with different lengths ranging from 19 to 28 nt. Values in the parentheses indicate the percentages of sRNAs with different lengths.

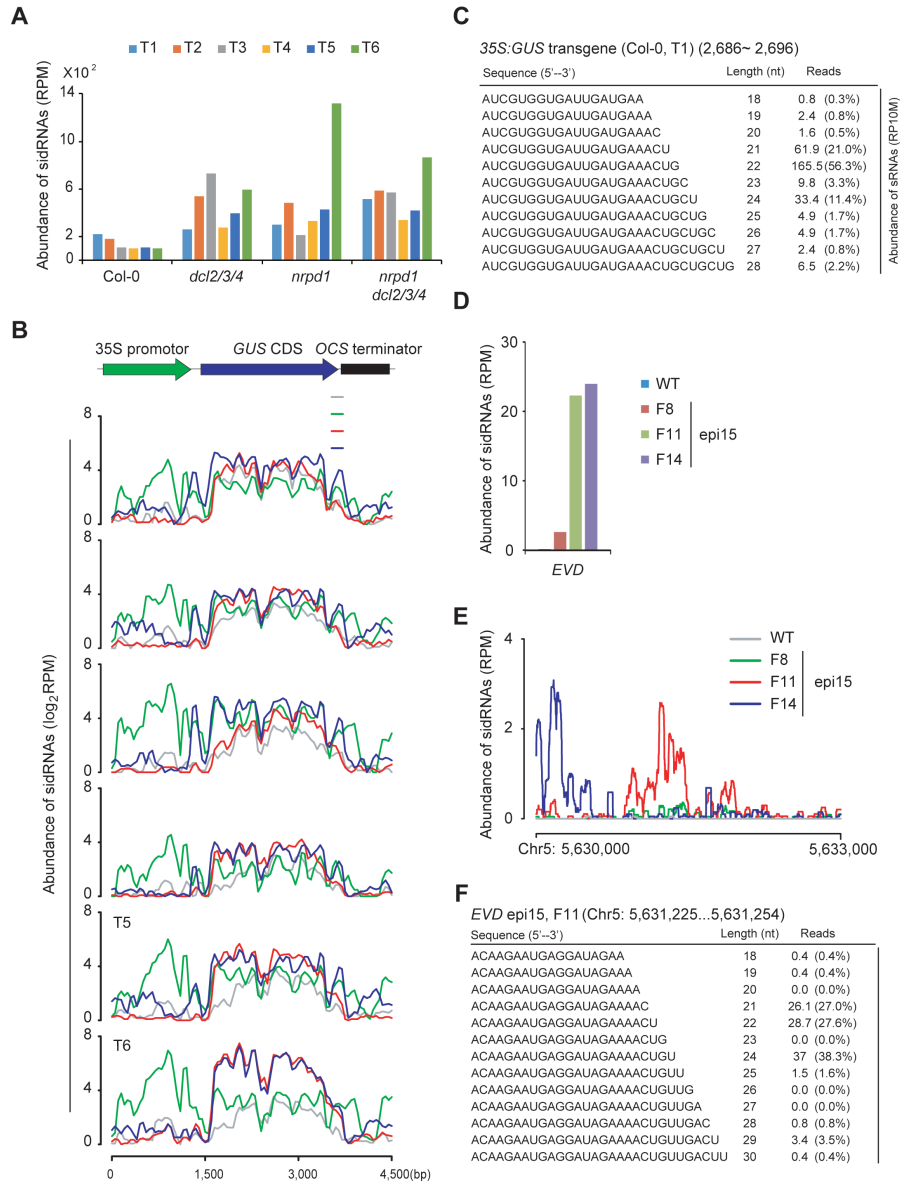

**Figure S3, Detection of sidRNAs from Transgenic Loci and Transposons Undergoing *de novo* Silencing, Related to Figure 1.**

(A, B) Detection of sidRNAs derived from transgenic loci in T1-T6 generations of the indicated genotypes by deep sequencing analysis.

(C) A representative group of ladderred sRNAs produced from transgenic loci in T1 generation in Col-0 background. Numbers represent the abundance (RPM) of sRNAs with different lengths ranging from 18 to 28 nt. Values in the parentheses indicate the percentages of sRNAs with different lengths.

(D, E) Detection of sidRNAs mapped to *EVD* locus in *epi15* F8, F11, F14, and wild-type (WT) plants by deep sequencing analysis.

(F) A representative group of ladderred sRNAs produced from *EVD* locus in *epi15* F11 plants. Numbers represent the abundance (RPM) of sRNAs with different lengths ranging from 18 to 30 nt. Values in the parentheses indicate the percentages of sRNAs with different lengths.

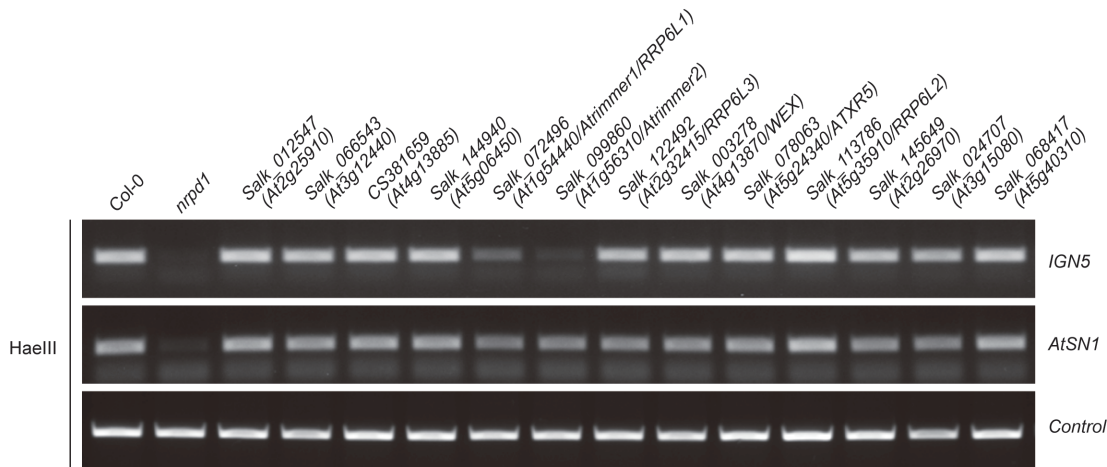

**Figure S4, Identification of Distributive 3'-5' Exonucleases Required for DNA Methylation, Related to Figure 6.**

DNA methylation levels at the *AtSN1* and *IGNS* loci in the indicated plants were measured by Chop-PCR. The methylation-sensitive restriction enzyme HaeIII was used to specifically cleave unmethylated DNA in CHH context. A fragment of *Actin* that lacks HaeIII sites was amplified as a control

## Extended Experimental Procedure

### Plant Materials

The *dcl2-1 dcl3-1 dcl4-2 (dcl2/3/4)*, *nrpd1-3 (nrpd1)*, *rdr2-1 (rdr2)* and *ago4-1 (ago4)* mutants in the Col-0 ecotype were described previously (Henderson et al., 2006; Onodera et al., 2005; Wierzbicki et al., 2009; Xie et al., 2004). The quadruple mutant *dcl1-9 dcl2-1 dcl3-1 dcl4-2 (dcl1/2/3/4)* was obtained by crossing *dcl2-1 dcl3-1 dcl4-2* with *dcl1-9 dcl2-5 dcl3-1 dcl4-2* (Blevins et al., 2011). The quadruple mutants *nrpd1 dcl2/3/4*, *rdr2 dcl2/3/4*, and *ago4 dcl2/3/4* were obtained by crossing *dcl2/3/4* with *nrpd1*, *rdr2*, and *ago4*, respectively. T-DNA insertion lines for genes encoding 3'-5' exonucleases in the Col-0 ecotype were obtained from the Arabidopsis Biological Resource Center (ABRC). All mutants were genotyped by PCR. The transgenic lines *NRPD1-FLAG* and *NRPD1(ASM)-FLAG* were described (Berger et al., 2009) and crossed into *nrpd1 dcl2/3/4*. The transgenic lines *GFP-AGO4* in Col-0 or *dcl2/3/4* background were described (Ye et al., 2012).

Constructs *pAGO4:GFP-AGO4* and *pAGO4:GFP-AGO4<sup>YF/AA</sup>* were described previously (Ye et al., 2012) and transformed into the *ago4 dcl2/3/4* mutant using the floral-dip method (Clough and Bent, 1998). Positive transformants were identified through selection for antibiotic resistance and confirmed by Western blot. The *GUS* gene was PCR-amplified, cloned into pENTR/D-TOPO (Invitrogen) and introduced into pEarley-Gate202 (Earley et al., 2006) through LR recombination reaction. The resulting *p35S:GUS* construct was transformed into Col-0, *nrpd1*, *dcl2/3/4* and *nrpd1 dcl2/3/4*. At least 50 lines were obtained for each genotype. Propagation of the transgenic lines was performed by single-seed descent procedures. In every generation, ten flowers from each plant of the same genotype were harvested and pooled for further analysis.

### sRNA Sequencing and Analysis

sRNAs of 18-30 nt or 30-60 nt were gel-purified on a 15% denaturing PAGE gel and subjected to library construction as described (Mi et al., 2008). A detailed protocol is available upon request. The libraries were single-end sequenced on an Illumina HiSeq2000 platform.

After removing adapters and low-quality reads, sRNA-seq reads were mapped to the *Arabidopsis* genome (TAIR10 version) with Bowtie (Langmead et al., 2009) allowing no mismatches, and the mapped reads were retained for further analyses.

sRNA reads from *dcl1/2/3/4* were used for identification of sidRNA loci. A sidRNA loci were annotated using the following criteria: 1) length  $\geq 100$  nt; 2) number of unique sRNAs  $\geq 5$ , each separated from nearest neighbors by a maximum of 50 nt; 3) expression level  $\geq 15$  RPKM (reads per kilobase per million).

sRNA abundance was calculated as reads per million (RPM) or reads per 10 million (RP10M). To identify sidRNA loci differentially expressed in different tissues or genotypes, edgeR was applied to calculate the fold change and p-value. The resulting p-values were adjusted by Benjamini-Hochberg's approach to control false discovery rate (FDR). Those showing  $\geq 3$  fold change at a FDR  $< 0.01$  were considered as differentially expressed loci.

#### **Whole-genome Bisulfite Sequencing and Analysis**

Paired-end bisulfite sequencing libraries were constructed using the NEXTflex Bisulfite-Seq kit (BIOO SCIENTIFIC) according to the manufacturer's instructions. About 2  $\mu\text{g}$  of genomic DNA was sonicated to  $\sim 300$  bp, end repaired and ligated to methylated adapters. Ligated products were subjected to bisulfite treatment using the EZ DNA Methylation-Gold kit (ZYMO Research) according to the manufacturer's instructions, and then PCR amplified for 15 cycles using EX Taq DNA polymerase (Takara). The amplified libraries were purified twice using Ampure XP purification beads (Beckman) prior to quantification with the Agilent 2100 Bioanalyzer. The libraries were paired-end sequenced on the Illumina HiSeq 2000 generating 2x100-mer reads.

Bisulfite sequencing reads were mapped to *Arabidopsis* genome (TAIR10) by BRAT-BW (Harris et al., 2012), allowing up to three mismatches. Only uniquely mapped non-redundant reads were retained for further methylation analysis. Chloroplast bulk fractional methylation was used to monitor bisulfite conversion efficiency. Fractional DNA methylation levels were calculated by  $\#C/(\#C+\#T)$ . CHH DMRs (differentially methylated regions) were defined as previously described (Stroud et al., 2013; Zhang et al., 2013). DNA methylation levels in every 200 bp sliding window with 50 bp step size were compared in wild-type and mutants. Only windows with more than four informative cytosine (i.e. coverage  $\geq 4$ ) were retained. The windows with absolute methylation difference  $> 0.1$  and Benjamini-Hochberg-adjusted FDR  $< 0.001$  (Fisher's exact test) were considered as differentially methylated bins. Then, those differentially methylated bins separated by gaps within 100 bp were merged together as differentially methylated regions (DMRs). The final coordinates were further adjusted from the first methylated cytosine to the last methylated cytosine.

#### **Analyses of Features of sidRNAs**

To analyze whether sidRNAs have 5' monophosphate ends, sRNAs in total extracts and AGO4 immunoprecipitates prepared from Col-0 and *dcl2/3/4* were treated with Terminator exonuclease (Epicentre) following the manufacturer's standard procedure. A synthetic 21-nt spike-in RNA with 5' monophosphate was added in the reactions and used as a positive control. To examine whether the

sRNAs are single- or double-stranded, the sRNA samples were incubated with RNase T1 (Thermo SCIENTIFIC) at 37°C for 20 mins and *AtREP2* sRNAs were probed by Northern blot. Spike-in RNAs including a 50-bp double-stranded RNA with 2-nt 3' over-hang (ds) and a 50-nt single-stranded (ss) RNA were added in the reactions and used as controls for RNase T1 digestion. Reactions were stopped by phenol/chloroform extraction, and the RNAs were collected by ethanol precipitation. The resultant RNAs were subjected to Northern blot analysis using a probe to detect *AtREP2*-derived sRNAs.

### Oligonucleotides

Primers and probes used in this study are listed below.

| Oligo                                     | Sequence (5'-3')                                              |
|-------------------------------------------|---------------------------------------------------------------|
| <b>Probes for small RNA Northern blot</b> |                                                               |
| anti-miR171                               | GATATTGGCGCGCTCAATCA                                          |
| anti-ta-siR255                            | TACGCTATGTTGGACTTAGAA                                         |
| anti-AtREP2                               | GCGGGACGGGTTTGGCAGGACGTTACTTAAT                               |
| anti-SIMPLEHAT2                           | TGGGTTACCCATTTTGACACCCCTA                                     |
| anti-AtSN1-1                              | CACCAACGTGTTGTTGGCCAGTGGTAAATCTCTCAGATAGAGGTGCTGGATTTCGAGACA  |
| anti-AtSN1-2                              | CTCTCAGATAGAGGTGCTGGATTTCGAGACACGTTGGGAAGGATCTCTTTTCCAAAGAAGA |
| anti-AtSN1-3                              | CGTTGGGAAGGATCTCTTTTCCAAAGAAGATGAATTTCTGGTATGGGTCCCGCCTCTGGG  |
| anti-AtSN1-4                              | ATTCTGGTATGGGTCCCGCCTCTGGGAGATGTAAGGCCTTTGGGCCTGAACCTCCAG     |
| anti-At4TE27090                           | GTCTGAGAAGATTATGGGTTTCGGCCAGAACCTCATGGATTTTC                  |
| anti-IGN5-1                               | AGTTTTGTTGGCTATTGGGCCGAATAACAGCAAGTCCTTT                      |
| anti-IGN5-2                               | TCTGAGGTATCCATAGCCCTGATCCATCTTCAATTAG                         |
| anti-sidRL2514                            | GATACGGGCTTTGCCCTCCATGCCCAATTCGGCCCAAACAC                     |
| anti-sidRL5049                            | TGGAGAAAAGATCTCTCCCAACGTACCTTGAACCCAGCATCT                    |

### Primers for bisulfite sequencing

|                |                                                |
|----------------|------------------------------------------------|
| AtREP2-BiF     | AYAYTTTTGTGGTATATTGAAATG                       |
| AtREP2-BiR     | CCAACCCRTACCRTAATAAAACTAT                      |
| SIMPLEHAT2-BiF | TAGGGGTGTTAAAATGGGTTAAAATT                     |
| SIMPLEHAT2-BiR | ATAAAAAAATTACGAATTTACTTTTTCTC                  |
| IGN5-BiF       | GTTYYYGAGAAGAGTAGAAYAAATGYTAAATGTATYATGYGGTT   |
| IGN5-BiR       | RRACTAARTCTTRTCRAACAARRACCCAACCATRTCCRCTTAAAAA |
| AtSN1-BiF      | GTTGTATAAGTTTAGTTTTAATTTTAYGGATYAGTATTAATTT    |
| AtSN1-BiR      | CAATATACRATCCAAAAACARTTATTAATAAATAATATCTTAA    |
| sidL5049-BiF   | AGAGTAAGTTATTGGGGTTGGAGTG                      |
| sidL5049-BiR   | CAATCATTAAATARTCCAARTCTTTC                     |
| sidL2514-BiF   | TGAGTGGTGATAGGTTYTGAT                          |
| sidL2514-BiR   | CCAAATCCTAAATCATRAAAAATTTTAA                   |
| sidL14057-BiF  | TTAATTTGTYAYATTTAGYGTGTTT                      |
| sidL14057-BiR  | AAATTACTCCRCTTACTCACTTAA                       |

### Primers for Chop-PCR

---

|                |                               |
|----------------|-------------------------------|
| IGN5-HaeIII-F  | TCCCGAGAAGAGTAGAACAAATGCTAAAA |
| IGN5-HaeIII-R  | CTGAGGTATTCCATAGCCCTGATCC     |
| AtSN1-HaeIII-F | ACCAACGTGCTGTTGGCCAGTGGTAAATC |
| AtSN1-HaeIII-R | AAAATAAGTGGTGGTTGTACAAGC      |
| ACT2-HaeIII-F  | CGAGCAGGAGATGGAAACCTCAA       |
| ACT2-HaeIII-R  | AAGAATGGAACCACCGATCCAGACA     |

---

### Primers for AGO4-ChIP

|                   |                              |
|-------------------|------------------------------|
| ACTIN-ChIP-F      | GAGAGATTCAGATGCCCAGAAGTC     |
| ACTIN-ChIP-R      | TGGATTCCAGCAGCTTCCA          |
| AtREP2-ChIP-F     | AATGGCTGCCACTGGATTTT         |
| AtREP2-ChIP-R     | TGGAGAGATTTGGGAAGATTG        |
| solo LTR-ChIP-F   | GGATAGAGATGAATGATGGATAATGACA |
| solo LTR-ChIP-R   | TTATTTTGATCAGTGTATAAACCGGATA |
| IGN5-ChIP-F       | AAGCCCAAACCATACTAATAATCTAAT  |
| IGN5-ChIP-R       | CCGAATAACAGCAAGTCCTTTAATA    |
| SIMPLEHAT2-ChIP-F | TGATGGGTCAAATGAGTTGATGA      |
| SIMPLEHAT2-ChIP-R | TTGGGTAAATGGGTAAACCAT        |

---

### Primers for genotyping

|                        |                                   |
|------------------------|-----------------------------------|
| LBb1.3                 | ATTTGCCGATTTTCGGAAC               |
| LB3                    | TAGCATCTGAATTCATAACCAATCTCGATACAC |
| GABI-T8474             | ATAATAACGCTGCGGACATCTACATTTT      |
| dcl1(dcl1-9)_geno_R1   | AGTAGAAGAACCGCAGCTGAATC           |
| LB-pGV_CAF1_2(dcl1-9)  | GACACACACATCATCTCATTGATGCTTGG     |
| dcl2-1-genotyping-LP   | TGAATCATCTGGAAGAGGTGG             |
| dcl2-1-genotyping-RP   | CTTCACAGGAGTTTTTGGCTG             |
| dcl3-1-genotyping-LP   | ACAGGTAACCTTGCCATGTTG             |
| dcl3-1-genotyping-RP   | TGGAAAAGTTTGCTACAACGG             |
| dcl4-2-genotyping-P1   | TCTCCATATTGACCATCATACTCATT        |
| dcl4-2-genotyping-P2   | GGCTGCACAGCTGATGATTACAA           |
| dcl4-2-genotyping-P3   | GCCGCTCGAGATCATCAGCAAAGGAAT       |
| nrpd1a-3-genotyping-LP | TTTTGATCCCTTGATCACCTG             |
| nrpd1a-3-genotyping-RP | CTGATGGTCCCGTTGAAGATA             |
| rdr2-1-genotyping-P1   | ACACATTAGGACTAACAATTACC           |
| rdr2-1-genotyping-P2   | ATGGTGTGACAGACGACGACGAACCGATCAAC  |
| rdr2-1-genotyping-P3   | TAGCATCTGAATTCATAACCAATCTCGATACAC |
| ago4-1-genotyping-F    | TGACTGACAGCTGAAAATGGGATGTGGAT     |
| ago4-1-genotyping-R    | GCCACTCCCTAGAACTACCACCTAAGTT      |
| SALK_012547 LP         | CTTCTGCCAAGGCTAATATG              |



|                |                        |
|----------------|------------------------|
| SALK_012547 RP | TGATGCTGATTTTGCTGATTG  |
| SALK_066543 LP | ATAAAGAGCCGGTGGAGAAAC  |
| SALK_066543 RP | CGTCATCGTCAATGCTTAAGC  |
| CS381695 LP    | TGGTGATCAAGGGTAAAATC   |
| CS381695 RP    | TCACAGAGTCACCATCAATTCC |
| SALK_144940 LP | CAGTCATCTTGAACTTTGCC   |
| SALK_144940 RP | TGTTTGGAAAATGATATGGGG  |
| SALK_072496 LP | GAAAGGTAGATGAAGGGTGCC  |
| SALK_072496 RP | GCTGCAGATACCAAAAAGCAG  |
| SALK_099860 LP | GCTCTAACAGAGTCACAGCCG  |
| SALK_099860 RP | GTTTGGCCGTTAAGAGGGAAG  |
| SALK_122492 LP | AGTGGGCATTGATAAATGCAG  |
| SALK_122492 RP | ACCATTCGAAGGTTTCTCTGC  |
| SALK_003278 LP | CATATCTGGACAGTCGCAACC  |
| SALK_003278 RP | TCCGACCGTACAAGCTACAAC  |
| SALK_078063 LP | CGAAAATCAAATCAAAGACAG  |
| SALK_078063 RP | CACACGTGATCCAAACACAAG  |
| SALK_113786 LP | ACTCACCACTTAATTGCACGC  |
| SALK_113786 RP | ACCCATCATCTCCATCATCAG  |
| SALK_145649 LP | ACTTCTGCTCTCTTTGCC     |
| SALK_145649 RP | CCAATGGCTTCTTCTTCTCC   |
| SALK_024707 LP | AACAATAGATCAATGCGACGG  |
| SALK_024707 RP | GATTCCCAGAGCAGGAAGAC   |
| SALK_068417 LP | GATTAATGATTTCGTATGGCGG |
| SALK_068417 RP | GTTGTGCGTCCGAATATCAC   |
| SALK_050279 LP | TGGTTGGATACGAACATTTCG  |
| SALK_050279 RP | TCACAGTCGTGACTCGTGAAG  |

---

### Supplemental Reference

Berger, F., Haag, J.R., Pontes, O., and Pikaard, C.S. (2009). Metal A and Metal B Sites of Nuclear RNA Polymerases Pol IV and Pol V Are Required for siRNA-Dependent DNA Methylation and Gene Silencing. *PLoS ONE* 4, e4110.

Blevins, T., Rajeswaran, R., Aregger, M., Borah, B.K., Schepetilnikov, M., Baerlocher, L., Farinelli, L., Meins, F., Jr., Hohn, T., and Pooggin, M.M. (2011). Massive production of small RNAs from a non-coding region of Cauliflower mosaic virus in plant defense and viral counter-defense. *Nucleic acids research* 39, 5003-5014.

Clough, S.J., and Bent, A.F. (1998). Floral dip: a simplified method for *Agrobacterium*-mediated transformation of *Arabidopsis thaliana*. *The Plant journal : for cell and molecular biology* 16, 735-743.

Earley, K.W., Haag, J.R., Pontes, O., Opper, K., Juehne, T., Song, K., and Pikaard, C.S. (2006). Gateway-compatible vectors for plant functional genomics and proteomics. *The Plant journal : for cell and molecular biology* 45, 616-629.

Harris, E.Y., Ponts, N., Le Roch, K.G., and Lonardi, S. (2012). BRAT-BW: efficient and accurate mapping of bisulfite-treated reads. *Bioinformatics* 28, 1795-1796.

Henderson, I.R., Zhang, X., Lu, C., Johnson, L., Meyers, B.C., Green, P.J., and Jacobsen, S.E. (2006). Dissecting *Arabidopsis thaliana* DICER function in small RNA processing, gene silencing and DNA methylation patterning. *Nature Genetics* 38, 721-725.

Langmead, B., Trapnell, C., Pop, M., and Salzberg, S.L. (2009). Ultrafast and memory-efficient alignment of short DNA sequences to the human genome. *Genome biology* 10, R25.

Mi, S., Cai, T., Hu, Y., Chen, Y., Hodges, E., Ni, F., Wu, L., Li, S., Zhou, H., Long, C., *et al.* (2008). Sorting of small RNAs into *Arabidopsis* argonaute complexes is directed by the 5' terminal nucleotide. *Cell* 133, 116-127.

Onodera, Y., Haag, J.R., Ream, T., Costa Nunes, P., Pontes, O., and Pikaard, C.S. (2005). Plant nuclear RNA polymerase IV mediates siRNA and DNA methylation-dependent heterochromatin formation. *Cell* 120, 613-622.

Stroud, H., Greenberg, Maxim V.C., Feng, S., Bernatavichute, Yana V., and Jacobsen, Steven E. (2013). Comprehensive Analysis of Silencing Mutants Reveals Complex Regulation of the *Arabidopsis* Methylome. *Cell* 152, 352-364.

Wierzbicki, A.T., Ream, T.S., Haag, J.R., and Pikaard, C.S. (2009). RNA polymerase V transcription guides ARGONAUTE4 to chromatin. *Nat Genet* 41, 630-634.

Xie, Z., Johansen, L.K., Gustafson, A.M., Kasschau, K.D., Lellis, A.D., Zilberman, D., Jacobsen, S.E., and Carrington, J.C. (2004). Genetic and functional diversification of small RNA pathways in plants. *PLoS biology* 2, E104.

Ye, R., Wang, W., Iki, T., Liu, C., Wu, Y., Ishikawa, M., Zhou, X., and Qi, Y. (2012). Cytoplasmic Assembly and Selective Nuclear Import of *Arabidopsis* ARGONAUTE4/siRNA Complexes. *Molecular Cell* 46, 859-870.

Zhang, H., Ma, Z.Y., Zeng, L., Tanaka, K., Zhang, C.J., Ma, J., Bai, G., Wang, P., Zhang, S.W., Liu, Z.W., *et al.* (2013). DTF1 is a core component of RNA-directed DNA methylation and may assist in the recruitment of Pol IV. *Proceedings of the National Academy of Sciences of the United States of America* 110, 8290-8295.
